# Supplementary material
Source: PubMed Central journal article supplement (PMC4510919)
Supplement: NIHMS64218-supplement-fig_and_tables.pdf [file NIHMS64218-supplement-fig_and_tables.pdf]

1 **Supplementary Tables (S1, S2 and S3)**

2

3 **Table S1.** Bacteriological examination of lymph nodes and organs from sheep  
 4 inoculated by conjunctival route with  $10^9$  viable cfu of *M. agalactiae* wild type strain  
 5 (PG2) or Vpma phase locked mutants (PLMs) PLMU and PLMY and necropsied at  
 6 Day 20 p.i.

7

| LN <sup>a</sup>   | PLM Sheep               |                          |         |                          |                           | PG2 Sheep                |         |                          |                          |                          |
|-------------------|-------------------------|--------------------------|---------|--------------------------|---------------------------|--------------------------|---------|--------------------------|--------------------------|--------------------------|
|                   | #6                      | #7                       | #8      | #9                       | #10                       | #11                      | #12     | #13                      | #14                      | #15                      |
| MAN L             | - <sup>b</sup>          | -                        | -       | -                        | -                         | -                        | -       | -                        | -                        | -                        |
| MAN R             | +<br>7x10 <sup>3c</sup> | +<br>1.8x10 <sup>4</sup> | -       | +<br>NR <sup>d</sup>     | +<br>1.0 x10 <sup>4</sup> | -                        | -       | -                        | -                        | -                        |
| PAR L             | -                       | -                        | -       | -                        | -                         | -                        | -       | -                        | -                        | -                        |
| PAR R             | +<br>7x10 <sup>4</sup>  | +<br>0.9x10 <sup>6</sup> | +<br>NR | +<br>2.3x10 <sup>5</sup> | +<br>0.6 x10 <sup>4</sup> | +<br>4.2x10 <sup>3</sup> | +<br>NR | +<br>4.4x10 <sup>4</sup> | +<br>0.9x10 <sup>5</sup> | +<br>2.6x10 <sup>5</sup> |
| RPHM L            | -                       | -                        | -       | +<br>0.5x10 <sup>5</sup> | -                         | -                        | -       | -                        | -                        | +<br>1.4x10 <sup>3</sup> |
| RPHM R            | -                       | +<br>0.9x10 <sup>4</sup> | -       | -                        | -                         | -                        | -       | -                        | +<br>NR                  | -                        |
| RPHL L            | -                       | -                        | -       | -                        | -                         | -                        | -       | -                        | -                        | -                        |
| RPHL R            | -                       | +<br>0.6x10 <sup>5</sup> | -       | -                        | -                         | +<br>NR                  | -       | +<br>0.2x10 <sup>2</sup> | +<br>5.7x10 <sup>3</sup> | -                        |
| CSUP L            | -                       | -                        | -       | +<br>0.5x10 <sup>2</sup> | -                         | -                        | -       | -                        | -                        | -                        |
| CSUP R            | -                       | -                        | -       | +<br>NR                  | -                         | -                        | -       | -                        | -                        | -                        |
| MED               | -                       | -                        | -       | -                        | -                         | -                        | -       | -                        | -                        | -                        |
| JEJ               | -                       | -                        | -       | -                        | -                         | -                        | -       | -                        | -                        | -                        |
| SCRO L            | -                       | -                        | -       | +<br>NR                  | -                         | -                        | -       | -                        | -                        | -                        |
| SCRO R            | -                       | -                        | -       | -                        | -                         | -                        | -       | -                        | -                        | -                        |
| Kidney            | -                       | -                        | -       | -                        | -                         | -                        | -       | -                        | -                        | -                        |
| Spleen            | -                       | -                        | -       | -                        | -                         | -                        | -       | -                        | -                        | -                        |
| Lungs             | -                       | -                        | -       | -                        | -                         | -                        | -       | -                        | -                        | -                        |
| BALF <sup>e</sup> | -                       | -                        | -       | -                        | -                         | -                        | -       | -                        | -                        | -                        |

8

9 <sup>a</sup> LN (Lymph node) L (left) / R(right) –MAN: Mandibularis; PAR : Parotidialis; RPHM: Retropharyngeal  
 10 medialis; RPHL: Retropharyngeal lateralis; CSUP: Cervical superficialis; MED: Medialis; JEJ: jejunal;  
 11 SCRO: Scrotalis

12

13 <sup>b</sup> -: negative for *M. agalactiae* isolation; +: positive for *M. agalactiae* isolation

14

15 <sup>c</sup> Number of viable cfu/g of LN

16

17 <sup>d</sup> NR: No reisolation when plated directly for quantitative mycoplasma analysis and thereby implying a  
 18 very low initial bacterial count

19

20 <sup>e</sup>BALF: Bronchoalveolar lavage fluids

21

22 **Table S2:** Bacteriological examination of nasal and eye swabs from lambs inoculated  
 23 with  $10^9$  viable cfu of *M. agalactiae*

24

| Day pi | Swabs          | PLM Sheep       |    |    |     |     | PG2 Sheep |     |     |     |     |
|--------|----------------|-----------------|----|----|-----|-----|-----------|-----|-----|-----|-----|
|        |                | # 6             | #7 | #8 | # 9 | #10 | #11       | #12 | #13 | #14 | #15 |
| 1      | N <sup>a</sup> | ++ <sup>b</sup> | -  | ++ | +   | ++  | +         | -   | +   | -   | +   |
|        | E              | +               | +  | -  | +   | +   | -         | -   | +   | -   | -   |
| 2      | N              | ++              | +  | ++ | ++  | +   | +         | -   | -   | -   | +   |
|        | E              | -               | +  | +  | +   | +   | +         | -   | +   | -   | -   |
| 5      | N              | -               | +  | +  | +   | +   | +         | -   | -   | -   | -   |
|        | E              | +               | +  | +  | +   | +   | +         | -   | +   | +   | -   |
| 7      | N              | -               | +  | +  | -   | +   | +         | -   | -   | +   | +   |
|        | E              | -               | +  | +  | +   | +   | -         | -   | +   | +   | -   |
| 9      | N              | -               |    | +  | +   | ++  | +         | -   | -   | -   | +   |
|        | E              | -               | +  | +  | +   | +   | +         | +   | +   | +   | -   |
| 12     | N              | -               | -  | +  | -   | -   | -         | -   | -   | -   | -   |
|        | E              | -               | +  | -  | +   | +   | +         | +   | -   | -   | -   |
| 14     | N              | -               | +  | -  | -   | -   | -         | -   | -   | -   | -   |
|        | E              | -               | +  | -  | -   | +   | -         | -   | -   | -   | -   |
| 16     | N              | -               | +  | -  | -   | +   | -         | -   | -   | -   | -   |
|        | E              | -               | +  | -  | +   | +   | +         | -   | -   | -   | -   |
| 19     | N              | -               | -  | +  | -   | -   | +         | -   | -   | -   | -   |
|        | E              | -               | +  | -  | -   | +   | +         | -   | +   | +   | -   |

25

26

27

28

29

30

<sup>a</sup> N: nasal Swab; E: eye swab

<sup>b</sup> +: positive for right side; ++: positive for both left and right side; -: negative culture

31 **Table S3.** Quantitative bacteriological examination of lymph nodes and organs from  
 32 sheep inoculated by intramammary route with  $10^9$  viable cfu of *M. agalactiae* wild  
 33 type strain (PG2) or Vpma phase locked mutants (PLMs) PLMU and PLMY and  
 34 necropsied at Day 28 p.i.

| LN <sup>a</sup> | PLM Sheep                |                           |                          |                          |                      | PG2 Sheep                |                          |                          |                          |                          |
|-----------------|--------------------------|---------------------------|--------------------------|--------------------------|----------------------|--------------------------|--------------------------|--------------------------|--------------------------|--------------------------|
|                 | #6                       | #7                        | #8                       | #9                       | #10                  | #11                      | #12                      | #13                      | #14                      | #15                      |
| SUPM L          | - <sup>b</sup>           | +<br>1.9x10 <sup>2c</sup> | -                        | -                        | -                    | -                        | -                        | -                        | -                        | -                        |
| SUPM R          | -                        | +<br>1.5x10 <sup>3</sup>  | -                        | -                        | -                    | +<br>1.0x10 <sup>2</sup> | -                        | +<br>3.9x10 <sup>4</sup> | -                        | +<br>6.1x10              |
| ILI L           | +<br>9.1x10              | -                         | +<br>2.7x10 <sup>2</sup> | -                        | -                    | +<br>2.2x10 <sup>3</sup> | -                        | +<br>1.4x10 <sup>2</sup> | +<br>6.2x10              | -                        |
| ILI R           | +<br>3.5x10 <sup>2</sup> | -                         | +<br>0.7x10 <sup>2</sup> | -                        | +<br>NR <sup>d</sup> | +<br>NR                  | +<br>NR                  | +<br>1.3x10 <sup>2</sup> | +<br>2.5x10              | +<br>5.8x10 <sup>2</sup> |
| MES             | +<br>3.2x10 <sup>5</sup> | -                         | +<br>6.0x10 <sup>2</sup> | -                        | -                    | +<br>3.0x10 <sup>2</sup> | -                        | +<br>1.6x10              | -                        | -                        |
| MED             | -                        | -                         | +<br>1.6x10 <sup>2</sup> | -                        | -                    | -                        | -                        | -                        | -                        | -                        |
| CSUP L          | -                        | +<br>NR                   | -                        | -                        | -                    | -                        | -                        | -                        | -                        | -                        |
| CSUP R          | -                        | -                         | -                        | -                        | -                    | -                        | -                        | -                        | -                        | -                        |
| PAR L           | -                        | +<br>NR                   | -                        | -                        | -                    | -                        | -                        | -                        | -                        | -                        |
| PAR R           | -                        | +<br>NR                   | -                        | -                        | -                    | -                        | -                        | -                        | -                        | -                        |
| Udder L         | +<br>NR                  | +<br>5.3 x10 <sup>4</sup> | +<br>2.5x10 <sup>4</sup> | -                        | +<br>NR              | +<br>1.1x10 <sup>5</sup> | +<br>1.1x10 <sup>3</sup> | +<br>2.8x10 <sup>4</sup> | +<br>3.3x10 <sup>2</sup> | +<br>2.6x10 <sup>3</sup> |
| Udder R         | +<br>2.2x10 <sup>7</sup> | +<br>1.9 x10 <sup>7</sup> | +<br>1.1x10 <sup>7</sup> | +<br>2.3x10 <sup>2</sup> | -                    | +<br>8.9x10 <sup>5</sup> | +<br>1.2x10 <sup>7</sup> | +<br>2.2x10 <sup>8</sup> | +<br>3.3x10 <sup>6</sup> | +<br>3.3x10 <sup>6</sup> |

35  
 36 <sup>a</sup> LN (Lymph node) L (left) / R(right) – SUPM: Supramammary; ILI: Iliacis; MES: Mesenterialis; MED:  
 37 Medialis; CSUP: Cervicalis superficialis; PAR : Parotidialis

38  
 39 <sup>b</sup> -: negative for *M. agalactiae* isolation; +: positive for *M. agalactiae* isolation

40  
 41 <sup>c</sup> Number of viable cfu/g of LN

42

43 <sup>d</sup> NR: No reisolation when plated directly for quantitative mycoplasma analysis and thereby implying very  
44 low initial mycoplasmal counts

45  
46  
47  
48

49 **Supplementary figures (S1, S2, S3 & S4)**

50  
51

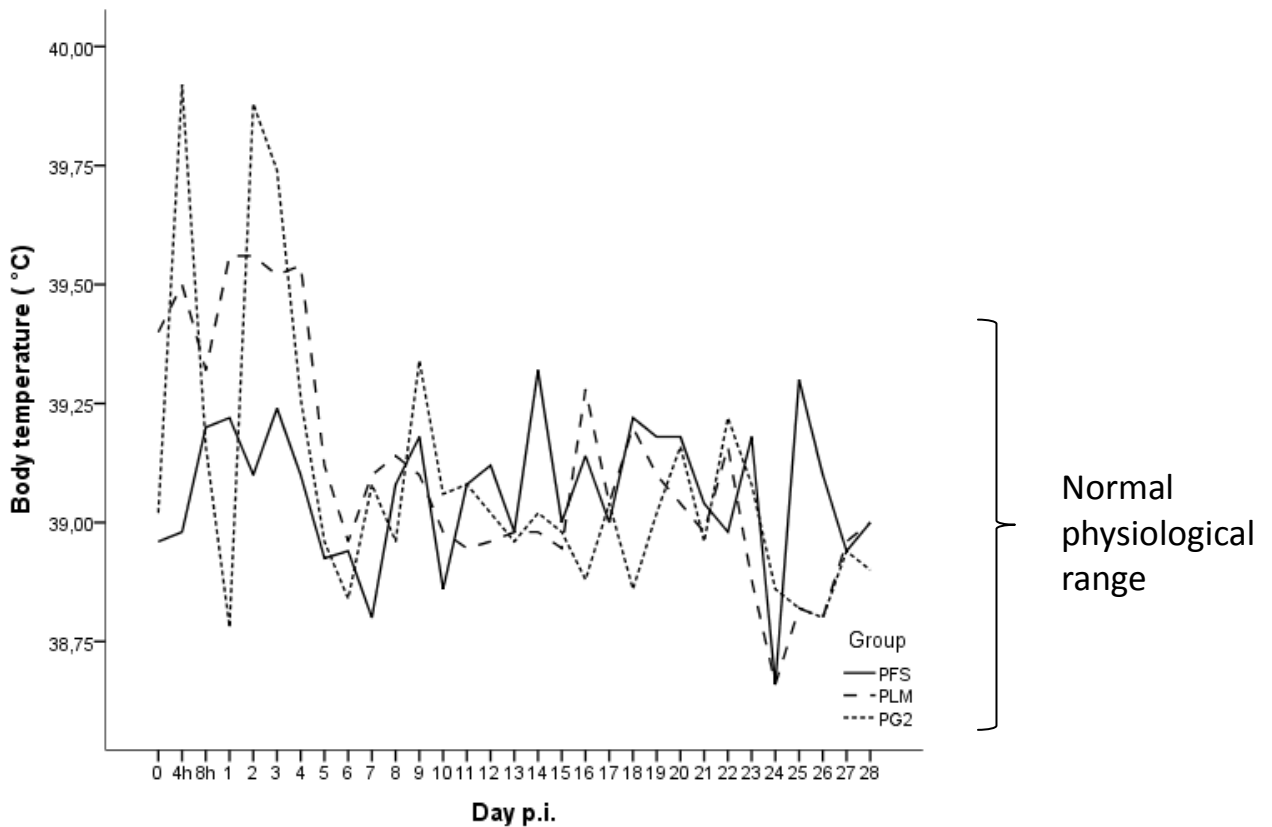

72 **Fig S1.** Mean body temperatures (°C) monitored via the rectal route shown as a function  
73 of time in the three groups of five ewes each, infected intramammarily with *M. agalactiae*  
74 wild type strain PG2 (...), Vpma phase invariable PLMs (---) and PFS (—), respectively. A  
75 biphasic increase in the mean body temperature of the PG2 infected sheep is observed  
76 at 4 h and Day 2 pi.

77

78  
79  
80

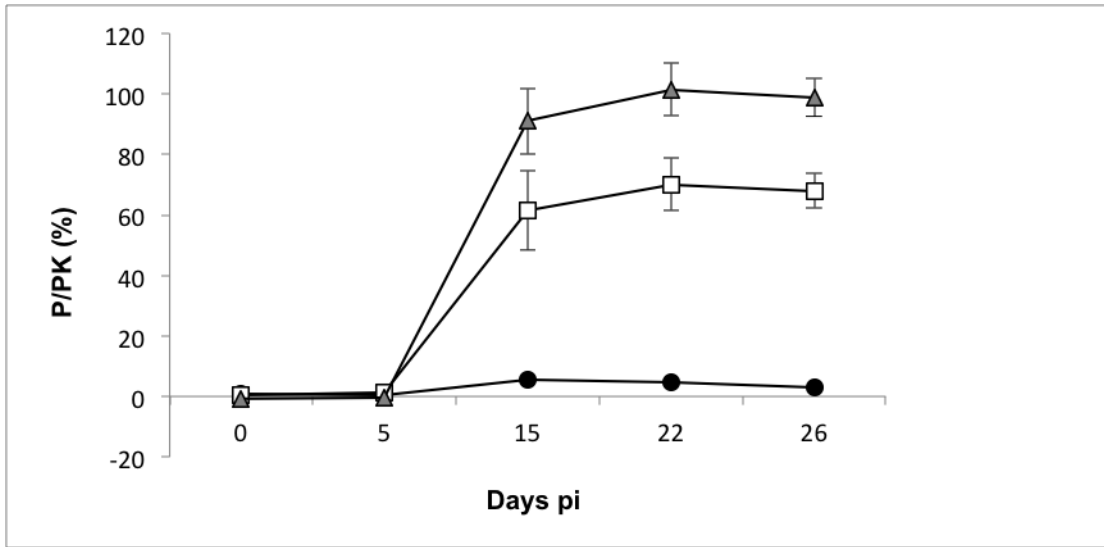

81  
82  
83  
84  
85  
86  
87

**Fig. S2** Time-course of *M. agalactiae* specific serological antibody response (measured by the IDEXX *M. agalactiae* Ab test kit) in sheep infected with PG2 (grey Δ), PLMs (white □) and PFS (black O) via the intramammary route. P/PK (%) values greater than 60 are considered positive as per manufacturer's instructions.

88

89

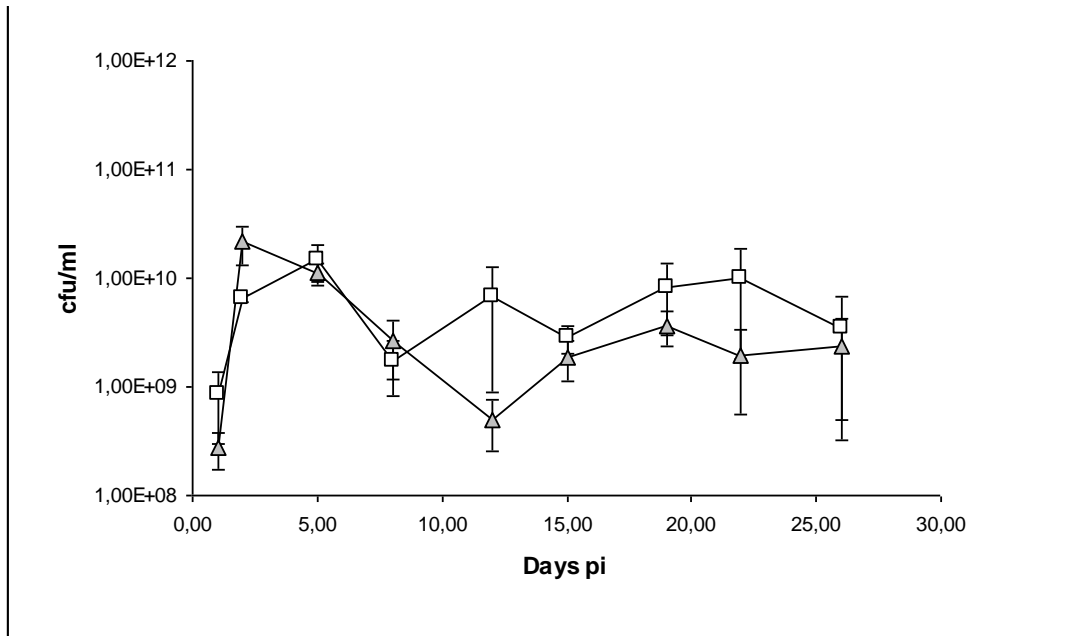

90

91

92

93 **Fig. S3.** Time-course of *M. agalactiae* excretion in milk obtained from the inoculated right  
94 udder halves of sheep experimentally infected with 10<sup>9</sup> viable cfu of type strain PG2 (grey  
95 Δ) and PLMs (white □). Mean log<sub>10</sub> cfu values of mycoplasmas per millilitre of milk are  
96 depicted and bars represent standard error of the mean.

97

98

99

100

101

**A**

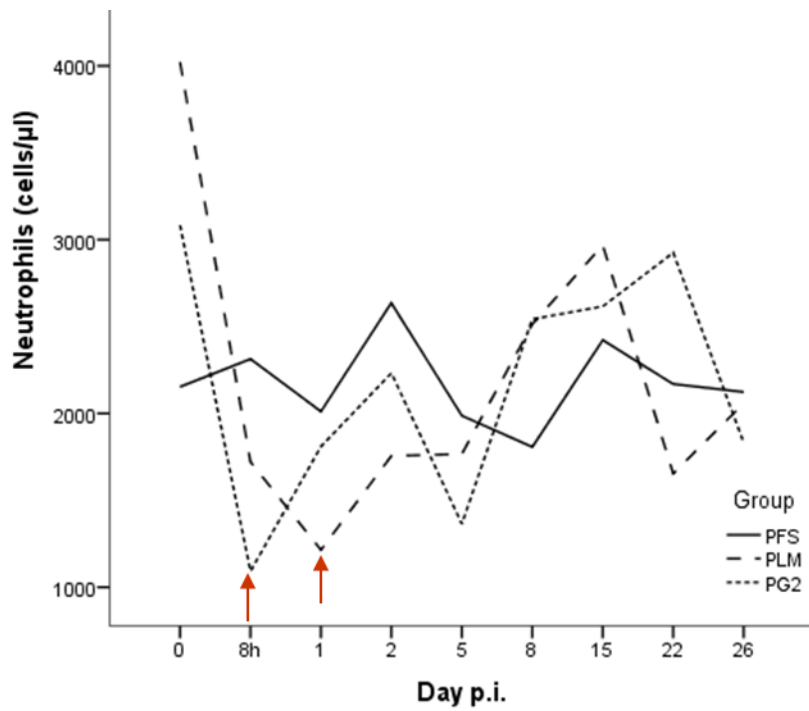

102

103

**B**

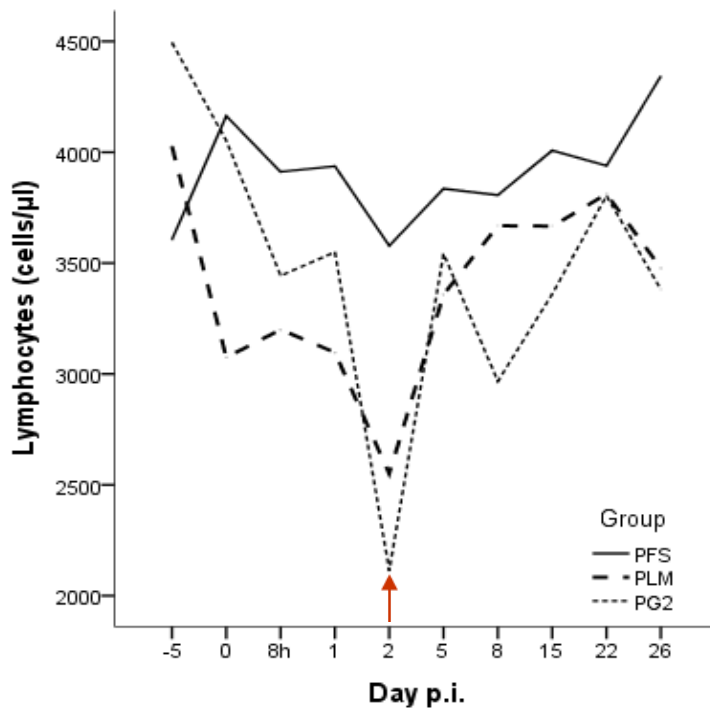

110

111

112

113

114

115

116

117

118

119

120

121

**Fig. S4.** Systemic responses to intramammary *M. agalactiae* infection. Blood samples were collected at regular intervals after inoculation and analyzed for differential neutrophil granulocyte (A) and lymphocyte counts (B). Mean cell counts

122 are indicated for five animals of each group at a given time point. Arrows indicate  
123 lymphopenia and neutropenia, respectively, with significant ( $P < 0.05$ ) differences  
124 between the control (PFS) and *M. agalactiae* infected animals (PLMs and PG2), and  
125 also between the PG2 and PLM groups in terms of time and/or extent of  
126 lymphopenia/neutropenia.

127
